# Supplementary material
Source: PubMed Central journal article supplement (PMC3308751)
Supplement: supp_M111.316208_jbc.M111.316208-2.pdf [file supp_M111.316208_jbc.M111.316208-2.pdf]

# Suppl. Fig. 2

## A

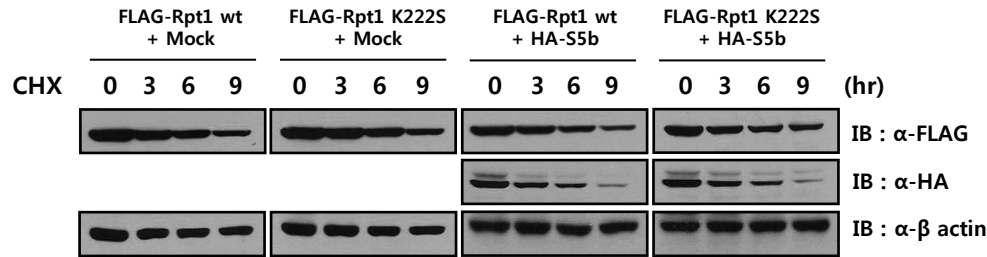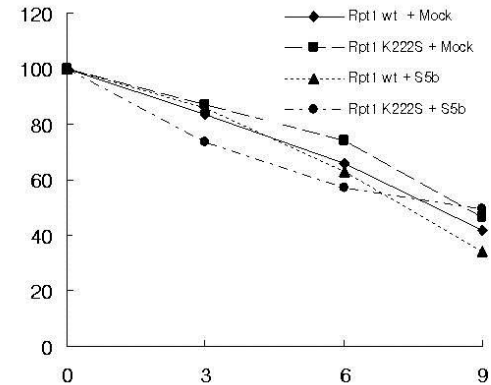

## B

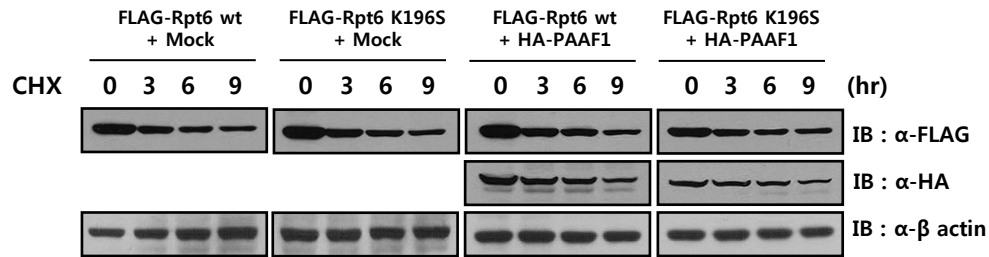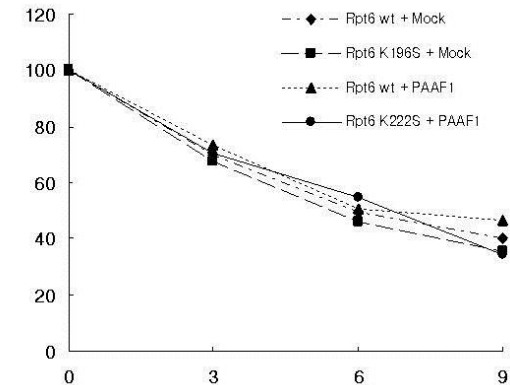

Fig. 2. The stability of the wild-type or Walker A mutant version of Rpt1 and Rpt6 is not affected by co-expression of the cognate chaperones. HeLa cells were transfected with the expression constructs of wild-type and Walker A mutant Rpt1 (A) or Rpt6 (B) with or without the expression vector for HA-S5b and HA-PAAF1 as indicated. Twenty-four hours after transfection, cycloheximide was added to all samples. Cells were harvested at the time points shown and the expression levels of Rpts were determined by Western blotting with anti-FLAG antibody. In all cases, actin levels were measured as a loading control. The graphs in the right panels illustrate densitometric analysis of FLAG signals.
